# Supplementary material
Source: PubMed Central journal article supplement (PMC5737626)
Supplement: NIHMS925856-supplement-1.pdf [file NIHMS925856-supplement-1.pdf]

Immunity

Supplemental Information

**BNIP3- and BNIP3L-Mediated Mitophagy Promotes  
the Generation of Natural Killer Cell Memory**

Timothy E. O'Sullivan, Lexus R. Johnson, Helen H. Kang, and Joseph C. Sun

# Supplementary Figure 1

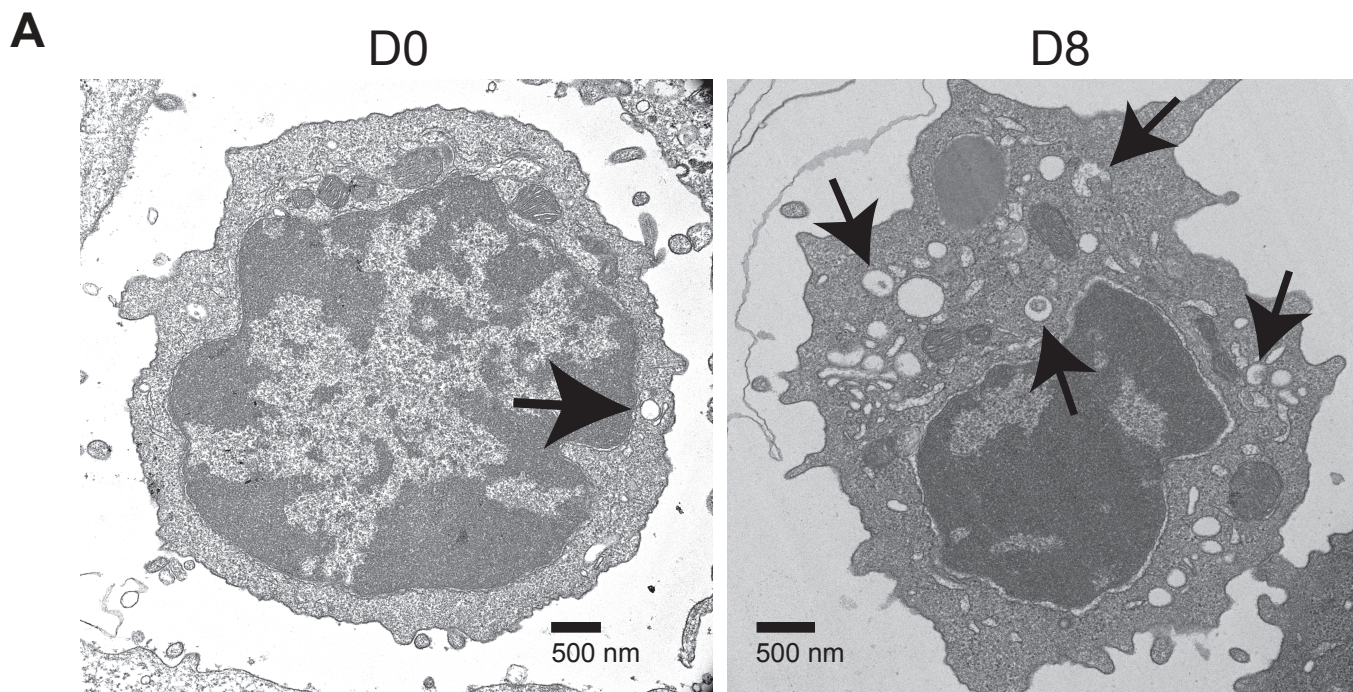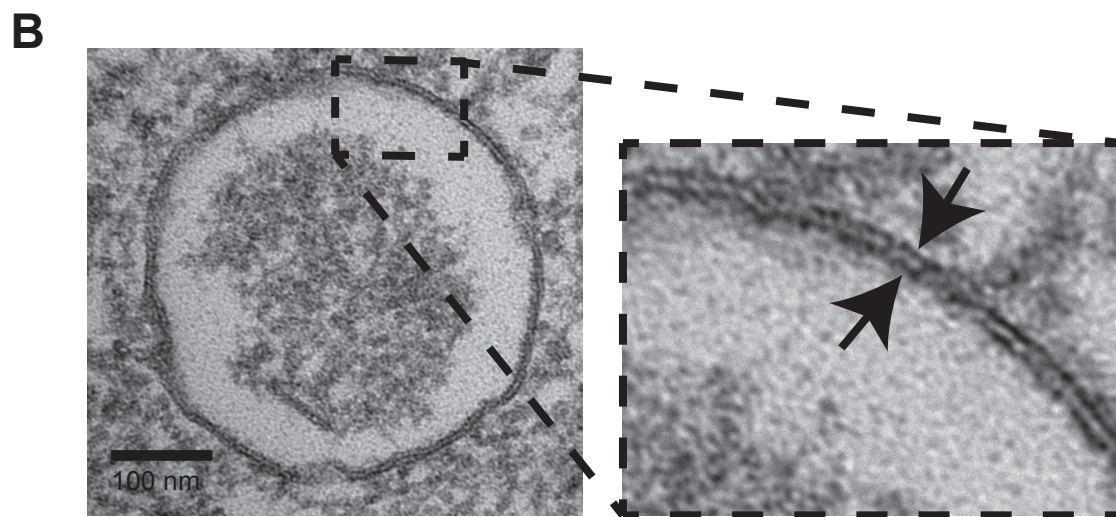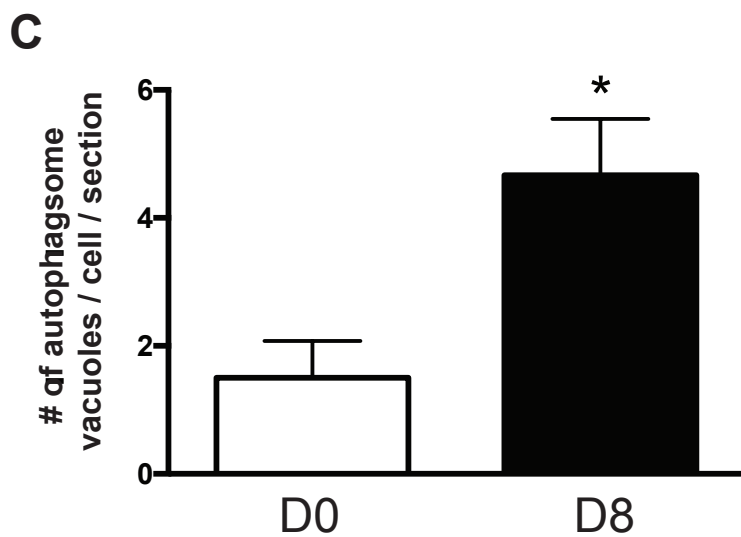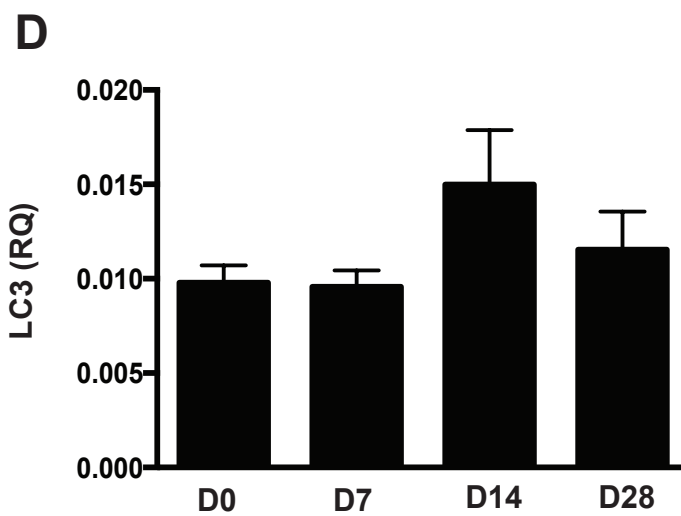

**Figure S1, related to Figure 2. Analysis of autophagosome formation in effector NK cells.** LC3-GFP Ly49H<sup>+</sup> NK cells were adoptively transferred into Ly49H-deficient mice and infected with MCMV. **(A)** Splenic Ly49H<sup>+</sup> NK cells were then sorted at D8 PI or D0 from LC3-GFP mice and analyzed by transmission electron microscopy (TEM). Representative TEM images of naïve (D0) or effector (D8 PI) Ly49H<sup>+</sup> NK cells at 25,000X magnification. Arrows indicate identified autophagosome structures. **(B)** Representative TEM image of a double membrane vesicle containing cytoplasmic cargo (or autophagosome) at 250,000X magnification. Arrows indicate each individual membrane. **(C)** Quantification of autophagosome structures per cell per section analyzed for each time point as indicated. **(D)** Splenic Ly49H<sup>+</sup> NK cells were sorted at the indicated time points PI from recipient mice, and analyzed for LC3b mRNA by qRT-PCR (n=3 for each time point). Data are representative of two independent experiments, with n = 3 per group per time point, or at least 4 cells/section with 4 independent sections with the indicated bar scale.

# Supplementary Figure 2

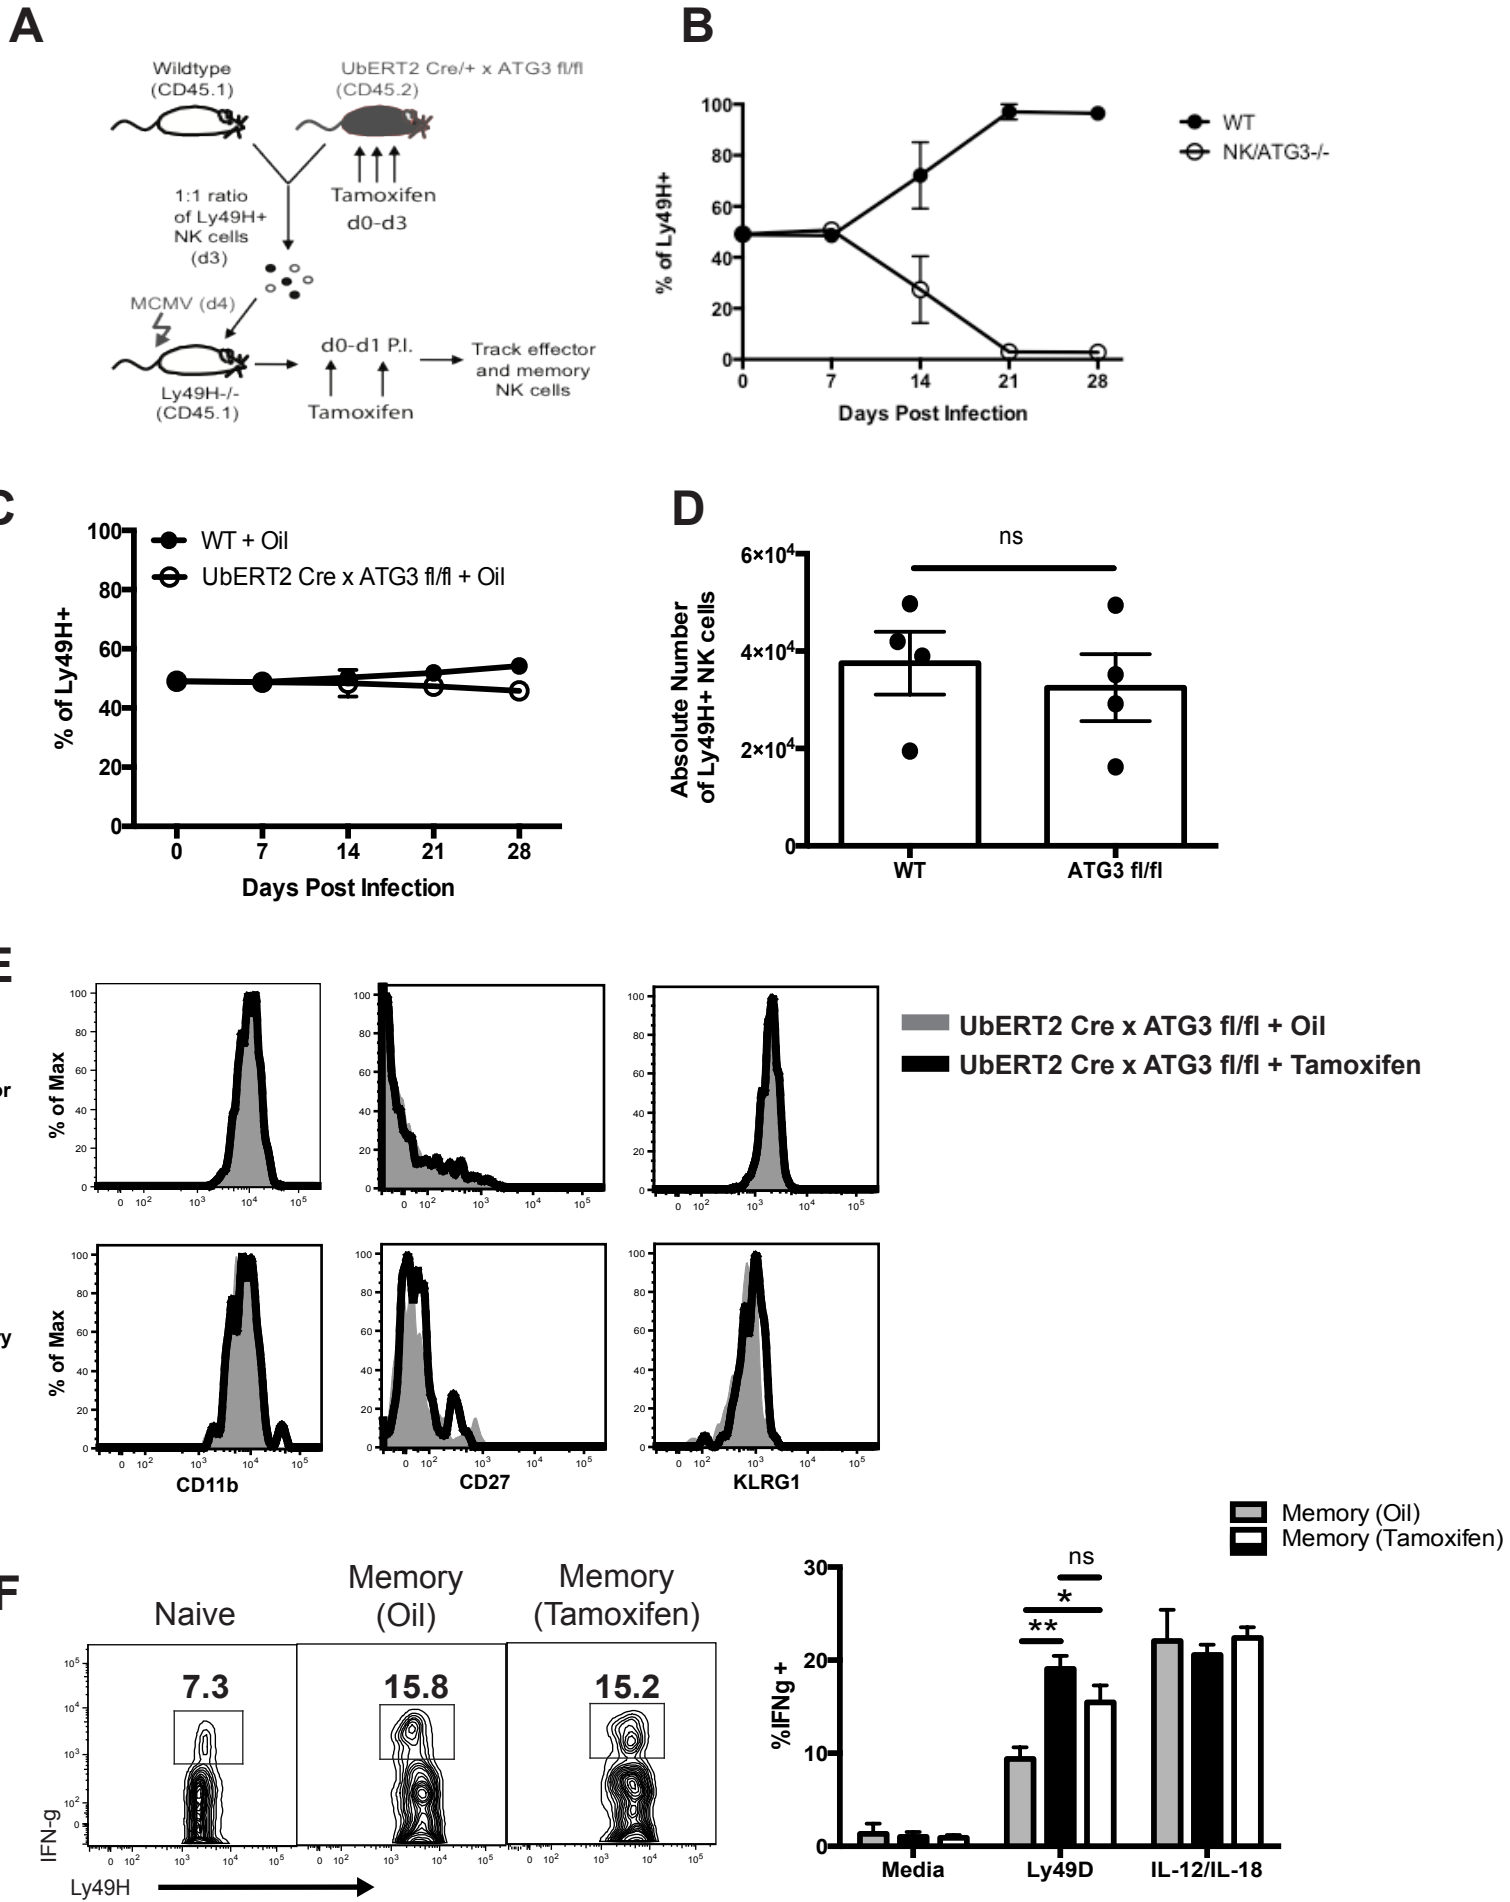

**Figure S2, related to Figure 3. *Atg3* is critical for the generation of memory NK cells.** (A) *UbcERT2-Cre x Atg3<sup>fl/fl</sup>* (CD45.2) mice received 1mg of tamoxifen i.p. daily from day 0 to 3.  $2 \times 10^5$  WT (CD45.1) and *UbcERT2-Cre x Atg3<sup>fl/fl</sup>* (CD45.2) splenic Ly49H<sup>+</sup> NK cells were mixed at a 1:1 ratio, transferred into Ly49H-deficient mice, and infected with MCMV. Recipients then received 1mg of tamoxifen i.p. daily from day 0 to 1 PI. (B) Percentages in the blood at various time points PI.  $2 \times 10^5$  WT (CD45.1) and *UbcERT2-Cre x Atg3<sup>fl/fl</sup>* (CD45.2) splenic Ly49H<sup>+</sup> NK cells were mixed at a 1:1 ratio, transferred into Ly49H- deficient mice, and infected with MCMV. Recipients then received 200ul of corn oil i.p. daily from day 4 to 8 PI (C) Percentages in the blood at various time points PI and (D) absolute numbers of indicated adoptively transferred Ly49H<sup>+</sup> NK cells on day 28 PI from recipient spleens (E) Representative histograms show cell surface staining of indicated markers on adoptively transferred Ly49H<sup>+</sup> NK cell populations. (F) Representative plots and quantitation of intracellular IFN- $\gamma$  in naïve or indicated adoptively transferred Ly49H<sup>+</sup> NK cells at D28 PI after stimulation with plate-bound anti-Ly49D monoclonal antibodies or IL-12 and IL-18 for 5 h.

# Supplementary Figure 3

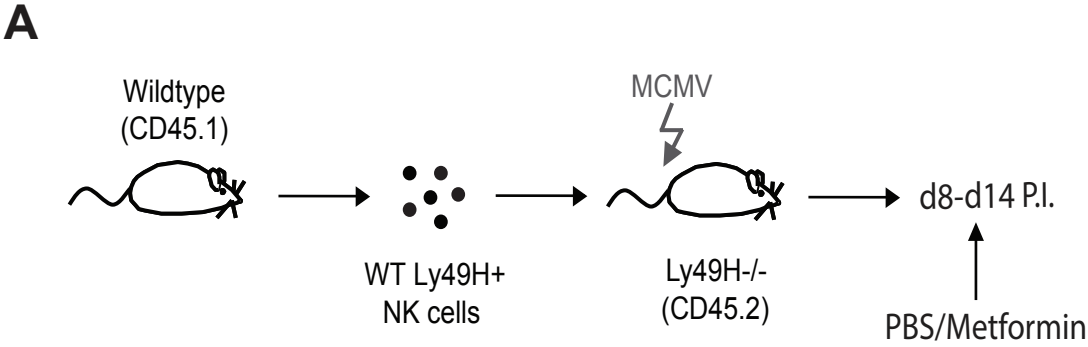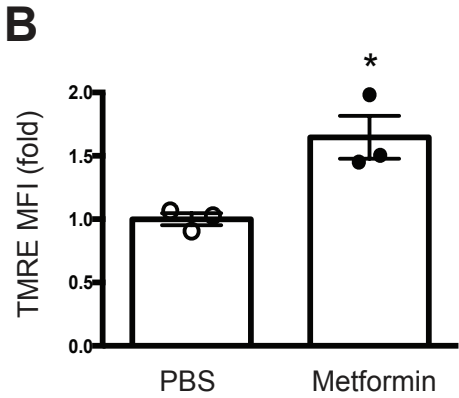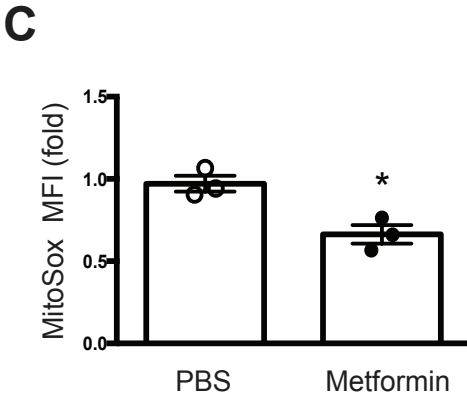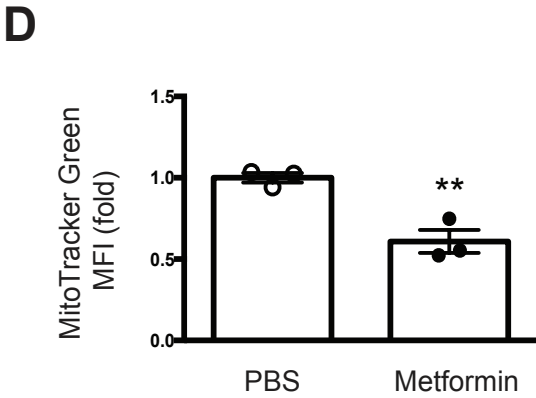

**Figure S3, related to Figure 4. Metformin-induced autophagic activity enhances dysfunctional mitochondrial clearance in NK cells during the contraction phase. (A)** Schematic of experiment. Briefly, splenic Ly49H<sup>+</sup> NK cells (CD45.1+) were transferred into Ly49H-deficient mice, and infected with MCMV. Recipient mice were then injected with either metformin or PBS i.p. daily from d8-d14 PI. **(B-D)** MitoTracker Green, TMRE, and MitoSox Red MFI values for transferred Ly49H<sup>+</sup> cells were normalized to PBS controls and plotted as the fold change in MFI at indicated time points PI.

# Supplementary Figure 4

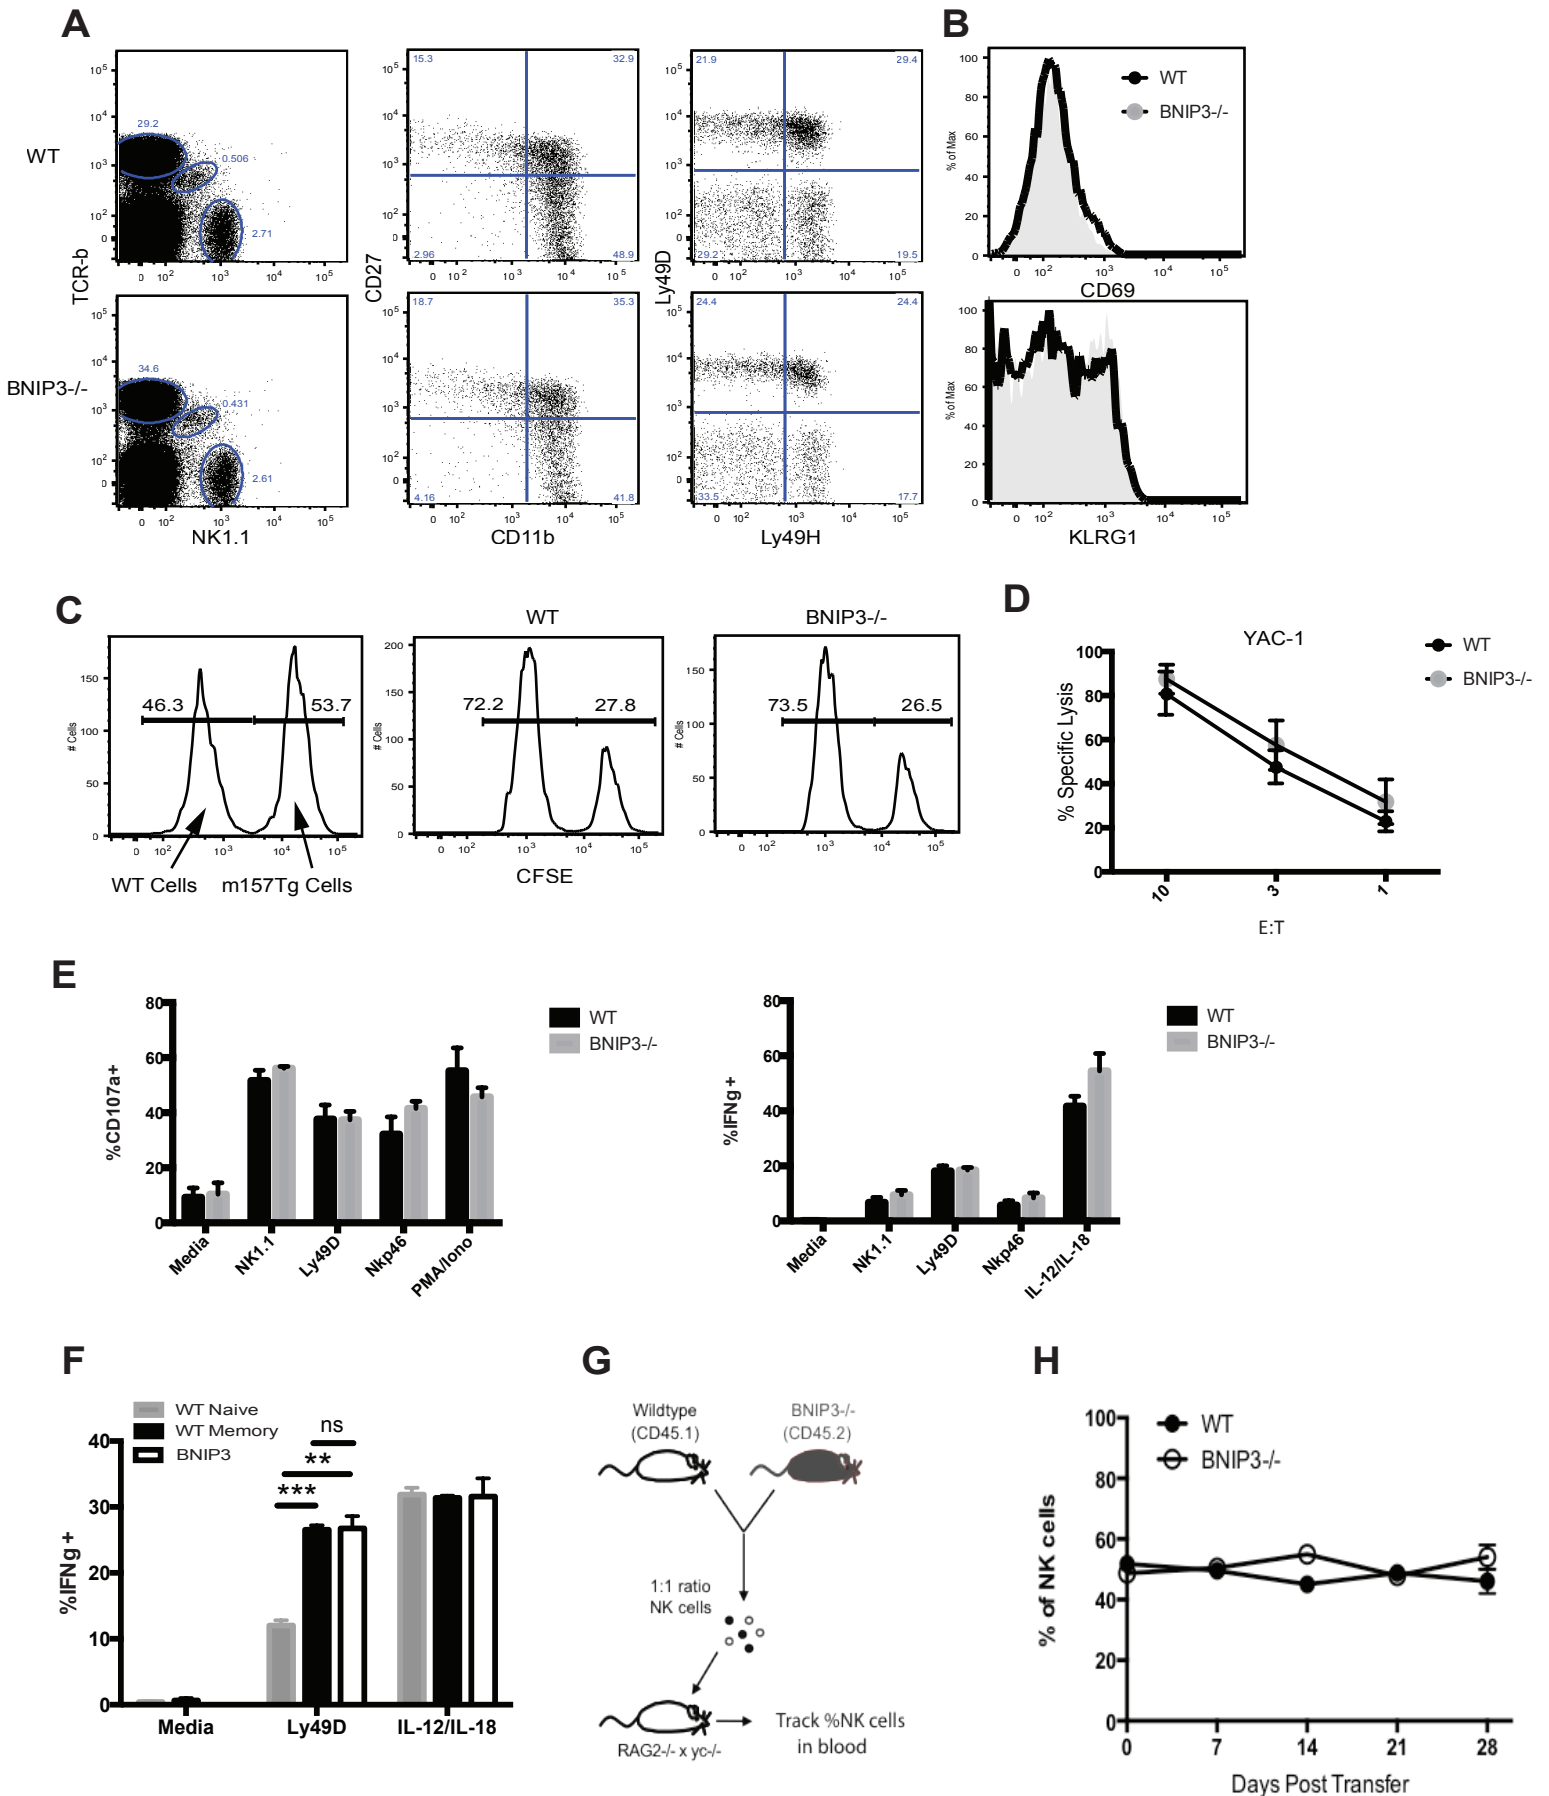



**Figure S4, related to Figure 6. *Bnip3*<sup>-/-</sup> NK cells display normal development, functionality, and homeostasis.** (A, B) Splenocytes from WT or *Bnip3*<sup>-/-</sup> mice were analyzed for the presence of mature NK cell markers by flow cytometry (C) Splenocytes from either WT or m157 transgenic mice were labeled with varying dilutions of CFSE and mixed at a 1:1 ratio and injected into either WT or *Bnip3*<sup>-/-</sup> recipients i.v. The percentage of each population is shown 48hrs after injection in harvested recipient spleens. (D) YAC-1 target cells were labeled with Cr<sup>51</sup> and incubated with purified NK cells from WT or *Bnip3*<sup>-/-</sup> spleens for 5 hours at indicated effector to target ratios. Percent specific lysis is given as the percentage chromium release into cultured supernatant normalized to freeze thawed permeablized YAC-1 controls. (E) WT and *Bnip3*<sup>-/-</sup> NK cells were stimulated for 5 h in RPMI containing 5% FBS with recombinant mouse IL-12, IL-18, or with indicated plate-bound antibodies. CD107a and IFN-gamma intracellular staining was performed after incubation for 5 hours and analyzed by flow cytometry. (F) Quantitation of intracellular IFN $\gamma$  staining of naïve or indicated adoptively transferred Ly49H<sup>+</sup> NK cells at D28 PI after stimulation with plate-bound anti-Ly49D monoclonal antibodies or IL-12 and IL-18 for 5 h in RPMI containing 5% FBS. (G) NK cells from *Bnip3*<sup>-/-</sup> (CD45.2) and WT (CD45.1) mice were mixed at a 1:1 ratio and adoptively transferred into RAG2<sup>-/-</sup> x  $\gamma$ c<sup>-/-</sup> recipients. (H) Relative percentage of transferred WT or *Bnip3*<sup>-/-</sup> NK cells within the total NK cell populations in the blood at various time points PI.

# Supplementary Figure 5

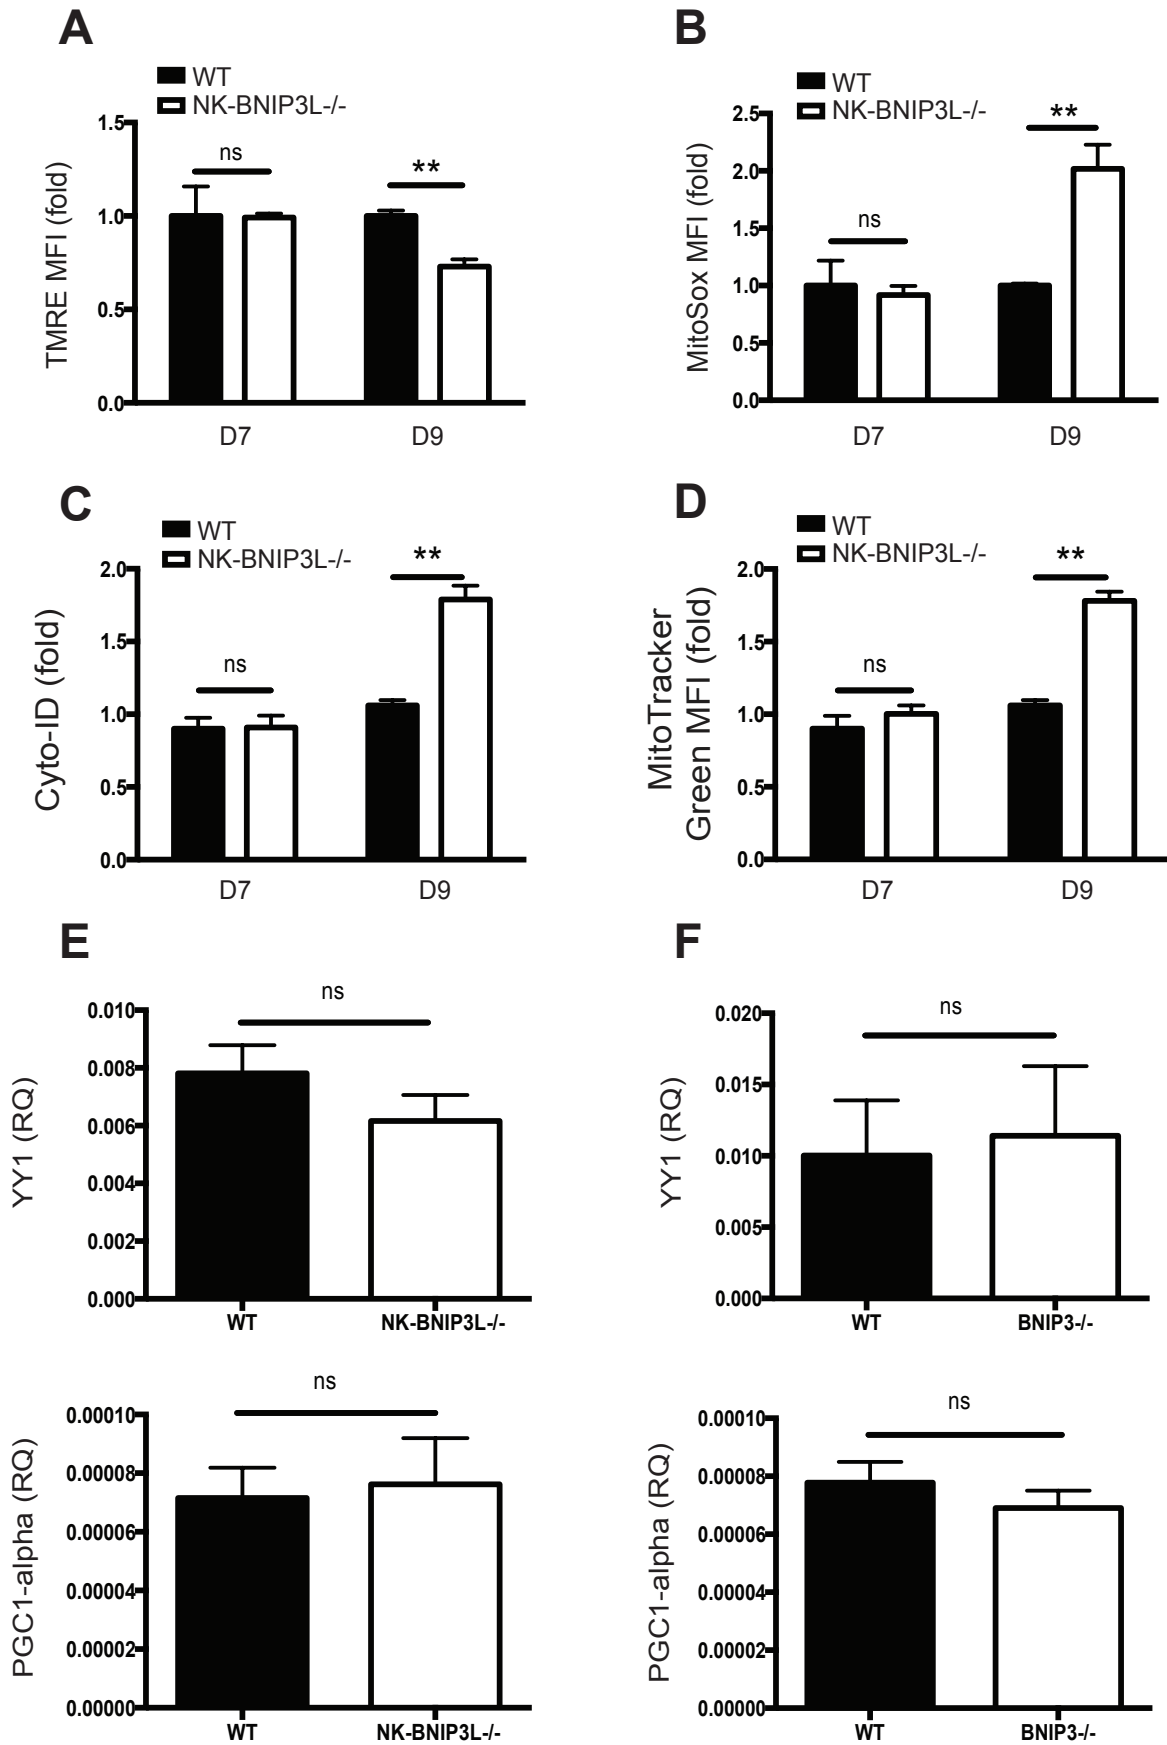

**Figure S5, related to Figure 7. BNIP3 and BNIP3L are required for the removal of dysfunctional mitochondria, but not PGC1 $\alpha$  or YY1 expression in NK cells**

**following viral infection.** (A-F) Equal numbers of WT and *NKp46<sup>iCre</sup> x Bnip3<sup>fl/fl</sup>* (NK/NIP3L<sup>-/-</sup>) NK cells were co-transferred into Ly49H-deficient mice, and infected with MCMV. Graphs show TMRE, MitoSox red, Cyto-ID, and MitoTracker Green MFI values for adoptively transferred *NK-Bnip3<sup>fl/fl</sup>* Ly49H<sup>+</sup> cells (normalized to co-transferred WT controls in each recipient mouse and plotted as the fold change) at indicated time points PI. (E,F) Splenic Ly49H<sup>+</sup> NK cells were sorted at (E) D7 and (F) D14 PI from recipient mice, and analyzed for PGC1 $\alpha$  or YY1 mRNA by qRT-PCR compared to co-adoptively transferred WT controls (n=3 for each time point).
